# Supplementary material for: Higher Efficiency of Percutaneous Microwave (MWA) Than Radiofrequency Ablation (RFA) in Achieving Complete Response in Cirrhotic Patients with Early Hepatocellular Carcinoma
Source: PubMed Central journal article supplement (PMC8025753; doi:10.3390/curroncol28020101), 2021-02-25
Supplement: curroncol-28-00101-s001.pdf [file curroncol-28-00101-s001.pdf]

| Nodules<br>n=250            | MWA<br>n=78 | RFA<br>n=172 | p value |
|-----------------------------|-------------|--------------|---------|
| Diameter, median mm (IQR)   | 25 (20-30)  | 21 (18-25)   | < 0.001 |
| Diameter                    |             |              |         |
| • 15-20 mm, n (%)           | 22 (28.2)   | 81 (47.1)    | < 0.05  |
| • 21-35 mm, n (%)           | 56 (71.8)   | 91 (52.9)    |         |
| Infiltrative nodules, n (%) | 2 (2.6)     | 3 (1.7)      | 0.857   |
| Complex position, n (%)     | 19 (24.4)   | 42 (24.4)    | 1.000   |
| Poor US visibility, n (%)   | 6 (7.7)     | 19 (11)      | 0.5     |
